# Supplementary material for: Arl13b regulates Shh signaling from both inside and outside the cilium
Source: PubMed Central journal article supplement — Mol Biol Cell. 2016 Nov 15;27(23):3780–90. doi: 10.1091/mbc.E16-03-0189 (PMC5170560; doi:10.1091/mbc.e16-03-0189), 2016-11-15
Supplement: supp_E16-03-0189v1_CombinedSupMats.pdf [file supp_E16-03-0189v1_CombinedSupMats.pdf]

# Supplemental Materials

*Molecular Biology of the Cell*

Mariani et al.

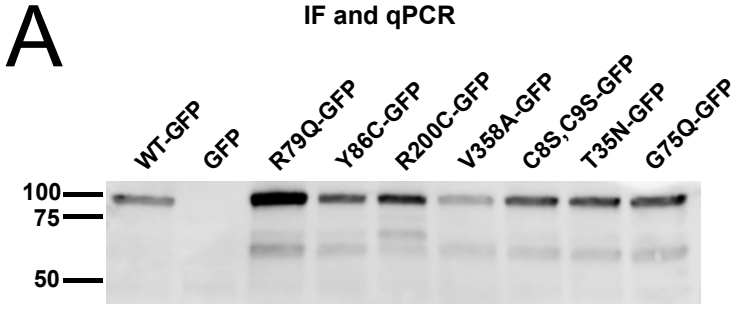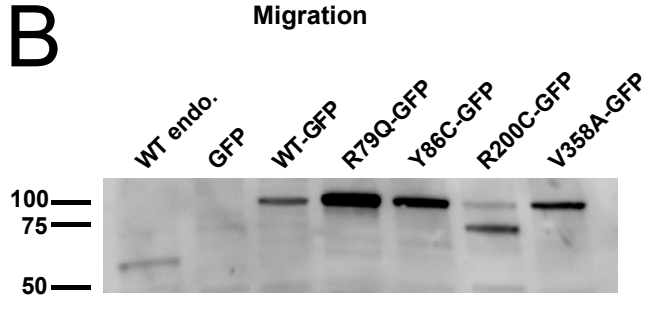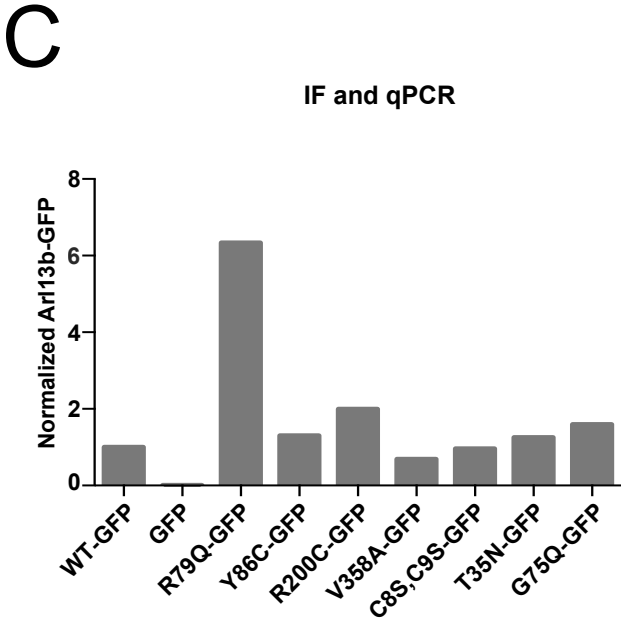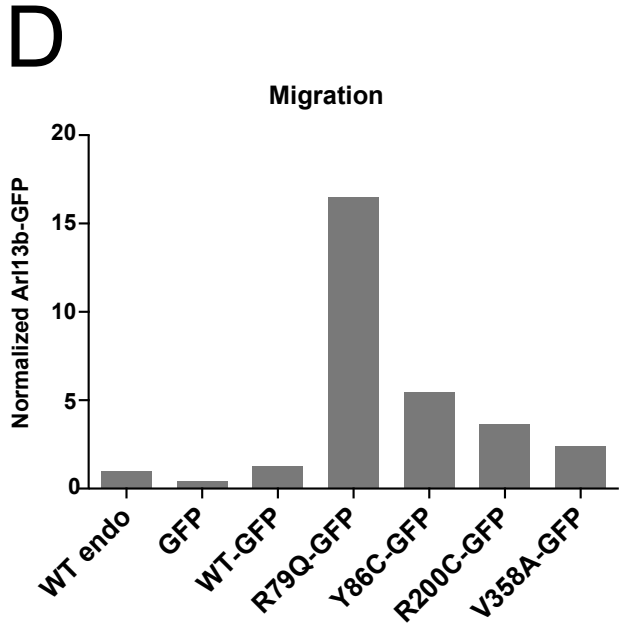

**Supplemental Figure 1:** Western analysis of *Arl13b*<sup>hmm</sup> MEF lysates expressing Arl13b-GFP mutants. **(A and C)** Representative Western blot **(A)** and its quantification **(C)** of MEF lysates from the lines analyzed for Shh target gene expression (Fig 3) and ciliary Smo enrichment (Fig 4). **(B and D)** Representative Western blot **(B)** and its quantification **(D)** of MEF lysates from the lines analyzed for Shh-dependent migration. Arl13b-GFP runs at 100 kDa; endogenous Arl13b runs at 60 kDa. Mutant levels were normalized to Arl13b-GFP level.
